# Supplementary material for: Safety and clinical efficacy of linezolid in children: a systematic review and meta-analysis
Source: PubMed Central journal article supplement (PMC9928924; doi:10.1007/s12519-022-00650-1), 2022-12-23
Supplement: 12519_2022_650_MOESM1_ESM.pdf [file 12519_2022_650_MOESM1_ESM.pdf]

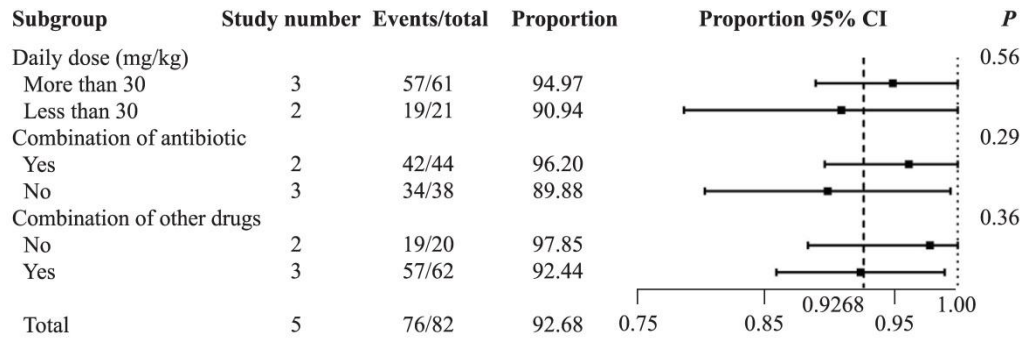

**Supplementary Fig. 1** Subgroup meta-analysis of microbial eradication in children after linezolid therapy. *CI* confidence interval

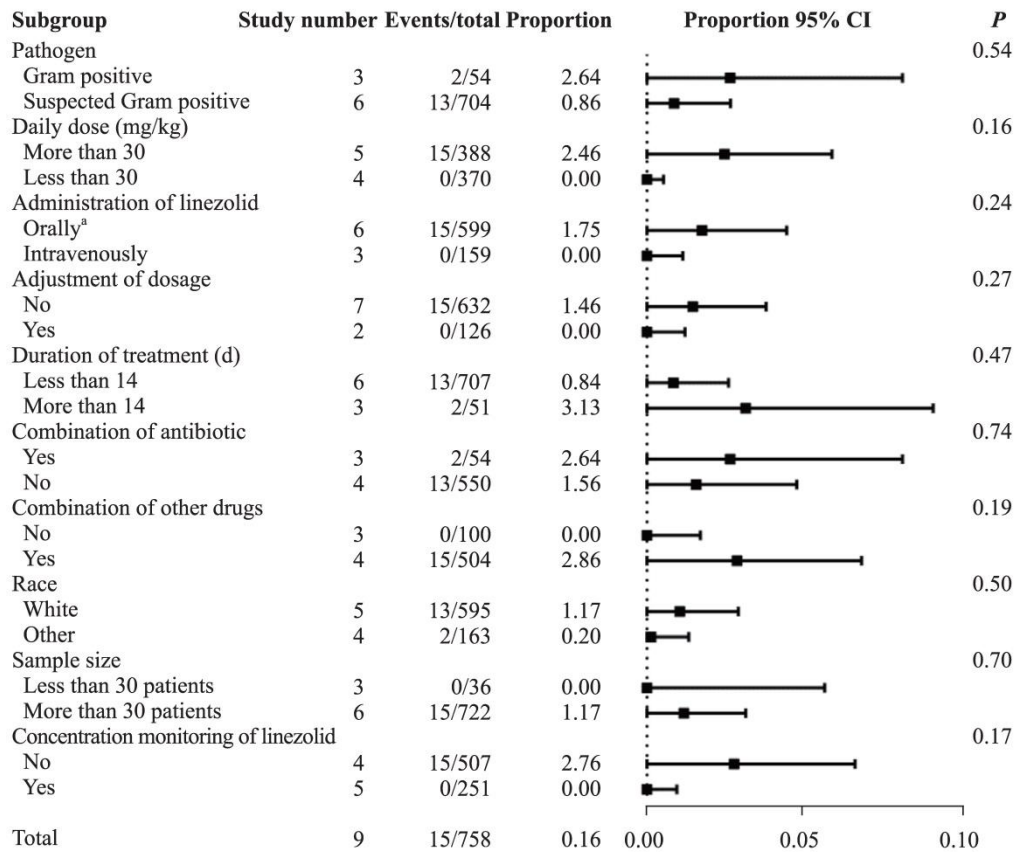

**Supplementary Fig. 2** Subgroup analysis of all-cause mortality in children after linezolid therapy. *CI* confidence interval. <sup>a</sup>Including patients receiving sequential therapy of linezolid
